# Supplementary material
Source: PubMed Central journal article supplement (PMC3020587)

CHL1-/- L1-ly, P7, Dil injection into somatosensory cortex, serial coronal sections (100  $\mu$ m)

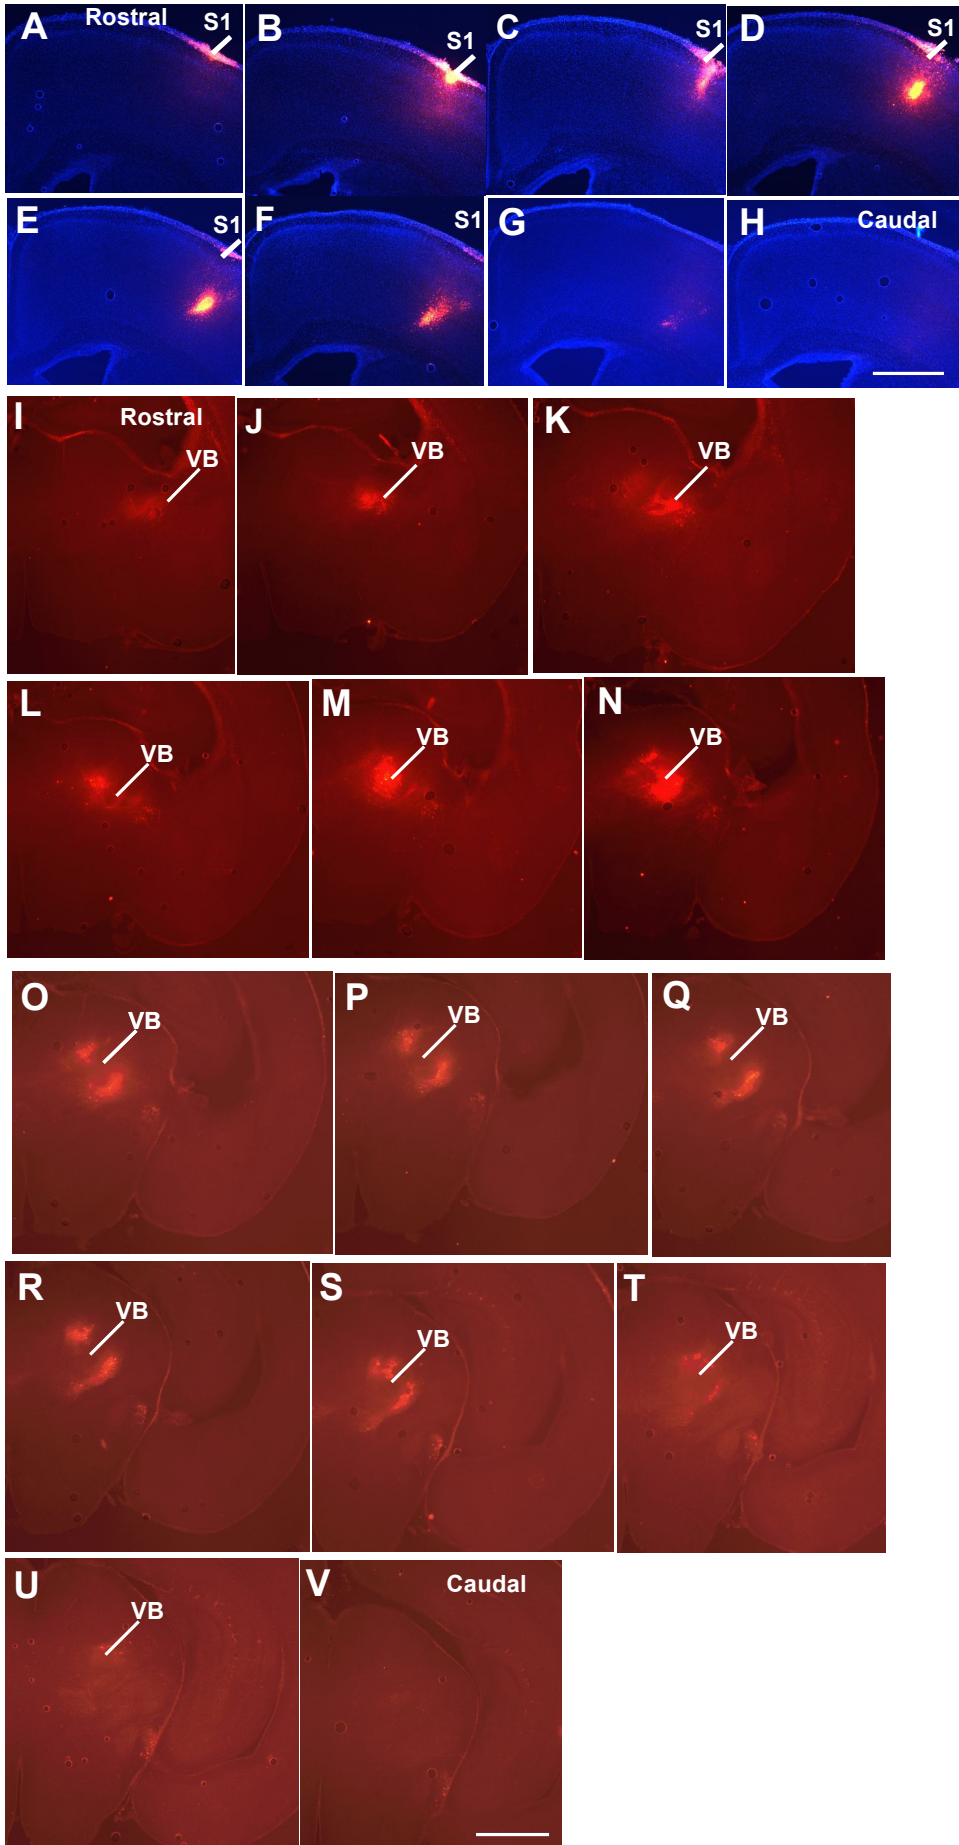

Supplement: supp_bhq115_cercor-2009-00904-File007.pdf [file supp_bhq115_cercor-2009-00904-File007.pdf]
